# Supplementary material
Source: publisher figshare collection journal article supplement (https://acs.figshare.com/ndownloader/files/4109596)
Supplement: Supplementary file 1 [file 4109596]

# J|A|C|S

---

## A R T I C L E S

### **Tetrathiafulvalene Hetero Radical Cation Dimerization in a Redox-Active [2]Catenane**

Cheng Wang,<sup>†</sup> Scott M. Dyar,<sup>†‡</sup> Dennis Cao,<sup>†±</sup> Albert C. Fahrenbach,<sup>†±</sup> Noah Horwitz,<sup>†‡</sup>  
Michael T. Colvin,<sup>†‡</sup> Raanan Carmieli,<sup>†‡</sup> Charlotte L. Stern,<sup>†</sup> Sanjeev K. Dey,<sup>†</sup>  
Michael R. Wasielewski<sup>†‡\*</sup> and J. Fraser Stoddart<sup>†±\*</sup>

<sup>†</sup> Department of Chemistry, Northwestern University, 2145 Sheridan Road, Evanston, IL 60208, United States

<sup>‡</sup> Argonne-Northwestern Solar Energy Research (ANSER) Center, Northwestern University,  
2145 Sheridan Road, Evanston, IL 60208, United States

<sup>±</sup> NanoCentury KAIST Institute and Graduate School of EEWS (WCU),  
Korea Advanced Institute of Science and Technology (KAIST), 373-1 Guseong Dong, Yuseong Gu,  
Daejeon 305-701, Republic of Korea

## **SUPPORTING INFORMATION**

### **Table of Contents**

|            |                                                                             |           |
|------------|-----------------------------------------------------------------------------|-----------|
| <b>S1.</b> | <b>X-Ray Crystallography .....</b>                                          | <b>S2</b> |
| <b>S2.</b> | <b>Electron Paramagnetic Resonance Spectroscopic Characterization .....</b> | <b>S4</b> |
| <b>S3.</b> | <b>Supplementary References .....</b>                                       | <b>S7</b> |

## S1. X-Ray Crystallography

**Data Collection for 6·4PF6:** A green block crystal of  $C_{74}H_{84}F_{24}N_8O_8P_4S_{10}$ , having the approximate dimensions of  $0.45 \times 0.42 \times 0.17$  mm, was mounted using oil (Infinitec V8512) on a glass fiber. All measurements were made on a CCD area detector with graphite monochromated MoK $\alpha$  radiation.

Cell constants and an orientation matrix for data collection corresponded to a monoclinic cell with dimensions:  $a = 22.1794(18)$ ,  $b = 13.6101(10)$ ,  $c = 29.949(2)$  Å,  $\alpha = 90.0$ ,  $\beta = 96.671(5)$   $\gamma = 90.0^\circ$ ,  $V = 8979.4(12)$  Å<sup>3</sup>.

For  $Z = 4$  and F.W. = 2113.94, the calculated density is  $1.564 \text{ g cm}^{-3}$ . Based on a statistical analysis of intensity distribution, and the successful solution and refinement of the structure, the space group was determined to be  $C2/c$ . The data was collected at a temperature of 100 (2) K with a theta range for the data collection of 2.97 to 67.27°. Data were collected in 0.5° oscillations with 10 second exposures. The crystal-to-detector distance was 40.00 mm.

**Data Reduction:** Of the 32165 reflections which were collected, 7626 were unique ( $R_{\text{int}} = 0.0519$ ). The linear absorption coefficient,  $\mu(\text{CuK}\alpha)$  radiation is  $3.907 \text{ mm}^{-1}$ . A numerical absorption correction was applied. Minimum and maximum transmission factors were: 0.2763 and 0.6078, respectively. The data were corrected for Lorentz and polarization effects.

**Table S1.** Crystal Data and Structure Refinement for **6·4PF<sub>6</sub>**

|                                                      |                                                                                                                                                                              |
|------------------------------------------------------|------------------------------------------------------------------------------------------------------------------------------------------------------------------------------|
| Empirical formula                                    | C <sub>74</sub> H <sub>84</sub> F <sub>24</sub> N <sub>8</sub> O <sub>8</sub> P <sub>4</sub> S <sub>10</sub>                                                                 |
| Formula weight                                       | 2113.97                                                                                                                                                                      |
| Crystal size                                         | 0.45 × 0.42 × 0.17 mm                                                                                                                                                        |
| Temperature                                          | 100(2) K                                                                                                                                                                     |
| Wavelength                                           | 1.54178 Å                                                                                                                                                                    |
| Crystal system, space group                          | Monoclinic, <i>C2/c</i>                                                                                                                                                      |
| Unit cell dimensions                                 | $a = 22.1794(18) \text{ Å}, \quad \alpha = 90.0^\circ$<br>$b = 13.6101(10) \text{ Å}, \quad \beta = 96.671(5)^\circ$<br>$c = 29.949(2) \text{ Å}, \quad \gamma = 90.0^\circ$ |
| Volume, <i>V</i>                                     | 8979.4(12) Å <sup>3</sup>                                                                                                                                                    |
| <i>Z</i> , Calculated density                        | 4, 1.564 g cm <sup>-3</sup>                                                                                                                                                  |
| Absorption coefficient                               | 3.907 mm <sup>-1</sup>                                                                                                                                                       |
| <i>F</i> (000)                                       | 4336                                                                                                                                                                         |
| Theta range for data collection                      | 2.97 to 67.27°                                                                                                                                                               |
| Limiting indices                                     | $-17 \leq h \leq 25, -15 \leq k \leq 15, -34 \leq l \leq 34$                                                                                                                 |
| Reflections collected / unique                       | 32165 / 7626 [ <i>R</i> <sub>int</sub> = 0.0519]                                                                                                                             |
| Completeness to $\theta = 67.27$                     | 94.5%                                                                                                                                                                        |
| Absorption correction                                | Numerical                                                                                                                                                                    |
| Max. and min. transmission                           | 0.6078 and 0.2763                                                                                                                                                            |
| Refinement method                                    | Full-matrix least-squares on <i>F</i> <sup>2</sup>                                                                                                                           |
| Data / restraints / parameters                       | 7626 / 0 / 682                                                                                                                                                               |
| Goodness-of-fit on <i>F</i> <sup>2</sup>             | 1.058                                                                                                                                                                        |
| Final <i>R</i> indices [ <i>I</i> > 2σ ( <i>I</i> )] | <i>R</i> <sub>1</sub> = 0.0848, <i>wR</i> <sub>2</sub> = 0.2275                                                                                                              |
| <i>R</i> indices (all data)                          | <i>R</i> <sub>1</sub> = 0.0987, <i>wR</i> <sub>2</sub> = 0.2385                                                                                                              |
| Largest diff. peak and hole                          | +1.515 and -0.611 e Å <sup>-3</sup>                                                                                                                                          |

## S2. Electron Paramagnetic Resonance Spectroscopy Characterization

EPR Measurements at X-band (9.5 GHz) were carried out at room temperature using a Bruker Elexsys E580-X EPR spectrometer outfitted with a variable Q dielectric resonator (ER-4118X-MD5-W1). All the samples were dissolved in degassed MeCN and prepared in a N<sub>2</sub>-filled glove box to ensure the absence of oxygen. Macrocycle **1** (0.3 mM), OTTFO-TEG (0.3 mM), STTFS-TEG (0.3 mM) and **6**·4PF<sub>6</sub> (0.2 mM) were oxidized with varying amounts of Fe(ClO<sub>4</sub>)<sub>3</sub>. For intensity-concentration calibration curves, OTTFO-TEG and STTFS-TEG were prepared in concentrations ranging from 0.1 to 0.8 mM, each with a single equivalent of oxidant. Samples were loaded into quartz tubes (1.5 mm I.D. x 1.8 mm O.D.) and sealed with a clear ridged UV doming epoxy (Epoxies, Etc., DC-7160 UV). All the samples were used immediately after preparation. Steady-state CW EPR spectra were measured at X-band using 2 mW microwave power and 0.1 G modulation amplitude at 100 KHz, with a time constant of 5.12 ms and a conversion time of 40.96 ms.

**Computational Method:** The EPR spectra were simulated (Figure S2 and S3) with a home-written program in MATLAB using representative spectra of the OTTFO<sup>•+</sup> and STTFS<sup>•+</sup> in equal concentration measured under the aforementioned conditions. A least-squares algorithm was used to fit a linear combination of OTTFO<sup>•+</sup> and STTFS<sup>•+</sup> spectra to the spectra of **6**·4PF<sub>6</sub> after addition of varying amounts of Fe(ClO<sub>4</sub>)<sub>3</sub>. Spectral broadening was accounted for by convoluting the representative spectra with a Lorentzian function individually before fitting. The second order rate constant for spin exchange was calculated from the additional Lorentzian linewidth as determined from the fits to the experimental data. Eqns. 1 and 2, derived for the simplistic model of individual radicals diffusing in solution<sup>S2</sup>, were used to obtain the rate constant  $k$  for spin exchange. The linewidth  $\Gamma$  of the Lorentzian line resulting from spin exchange broadening

is given in terms of the intrinsic linewidth  $\Gamma_0$ , the gyromagnetic ratio of the electron  $\gamma_e$ , and a lifetime between spin exchange events  $\tau$ .

$$\Gamma = \Gamma_0 + |2\gamma_e\tau|^{-1} \quad (1)$$

$$k = (2\tau[R])^{-1} \quad (2)$$

Here  $[R]$  is the concentration of the radical species, taken to be equal to the concentration of the catenane (0.2 mM) multiplied by the equivalents of oxidant added for samples with less than two equivalents of oxidant, and 2.00 multiplied by this concentration for samples with more than two equivalents of oxidant. The calculated rate constants for spectra showing significant broadening are on the order of  $10^{10} \text{ M}^{-1}\text{s}^{-1}$ , a rate that is slightly larger than those reported for nitroxide radicals in solution, which are consistent with a diffusion-controlled reaction. The large value

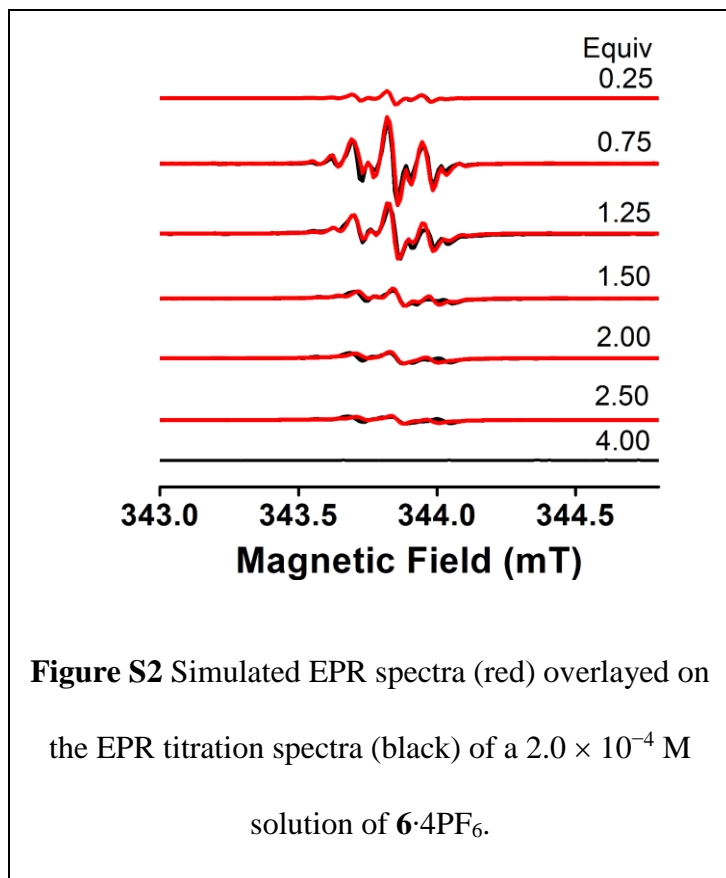

observed in this study may be due to a similarly high rate of spin exchange, but may also reflect higher effective activities of the radicals due to their proximity in the catenane ring. Figure S4 shows the maximum signal intensity of each spectrum plotted as a function of concentration. These plots demonstrate that at low concentrations of  $6\cdot 4\text{PF}_6$  (0.2 mM), the signal intensities of the representative spectra vary linearly with concentration,

which means there is no dimerization occurring and allows us to obtain relative concentrations of oxidized species by deconvolution of the spectra.

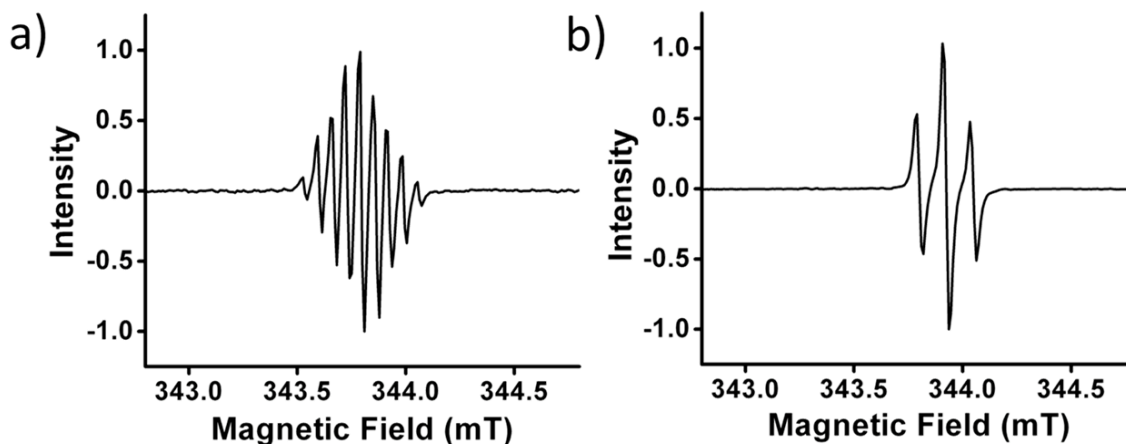

**Figure S3** The  $2^{++}$  (a) and  $3^{++}$  (b) spectra used for simulations of EPR titration spectra of  $6\cdot 4PF_6$  after addition of oxidant. These spectra were manually aligned on the X-axis with the spectra needing deconvolution, then home-written code in Matlab was used to calculate the percent contribution of each species (Table 1 in the main text).

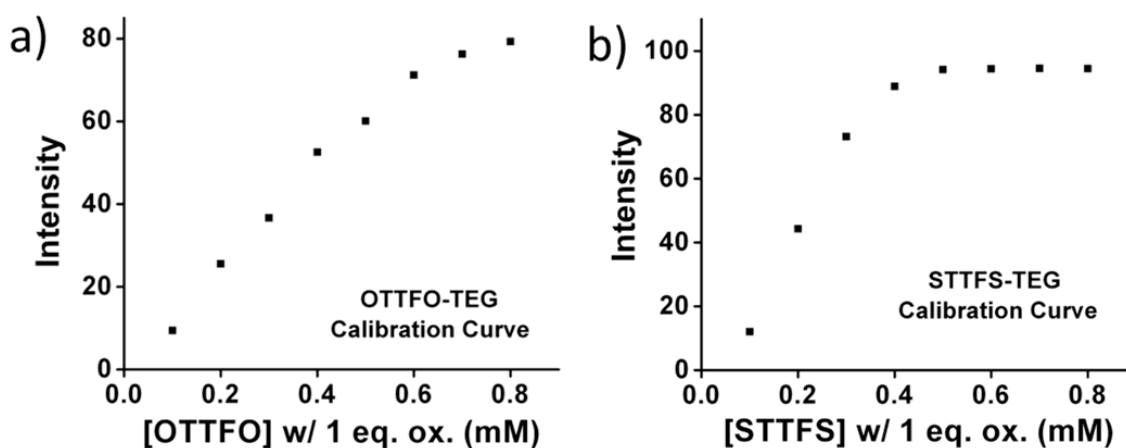

**Figure S4** Titration curves of varying amounts of OTTFO-TEG (a) and STTFS-TEG (b) oxidized with 1 equivalent  $Fe(ClO_4)_3$ .

### S3. Supplementary References

- S1. Spruell, J. M.; Coskun, A.; Friedman, D. C.; Forgan, R. S.; Sarjeant, A. A.; Trabolsi, A.; Fahrenbach, A. C.; Barin, G.; Paxton, W. F.; Dey, S. K.; Olson, M. A.; Benítez, D.; Tkatchouk, E.; Colvin, M. T.; Carmielli, R.; Caldwell, S. T.; Rosair, G. M.; Hewage, S. G.; Duclairoir, F.; Seymour, J. L.; Slawin, A. M. Z.; Goddard, W. A.; Wasielewski, M. R.; Cooke, G.; Stoddart, J. F. *Nature Chem.* **2011**, 2, 870–879.
- S2. Eastman, M. P.; Kooser, R. G.; Das, M. R.; Freed, J. H. *J. Chem. Phys.* **1969**, 51, 2690–2709.
